# Supplementary material
Source: PubMed Central journal article supplement (PMC4130277)
Supplement: hvi-10-544-s01.pdf [file hvi-10-544-s01.pdf]

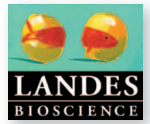

## **Supplemental Material to:**

**Eric A Weaver**

**Vaccines within vaccines**

**The use of adenovirus types 4 and 7 as influenza vaccine  
vectors**

**March 2014; 10(3)**

**<http://dx.doi.org/10.4161/hv.27152>**

**<http://www.landesbioscience.com/journals/vaccines/article/27152/>**

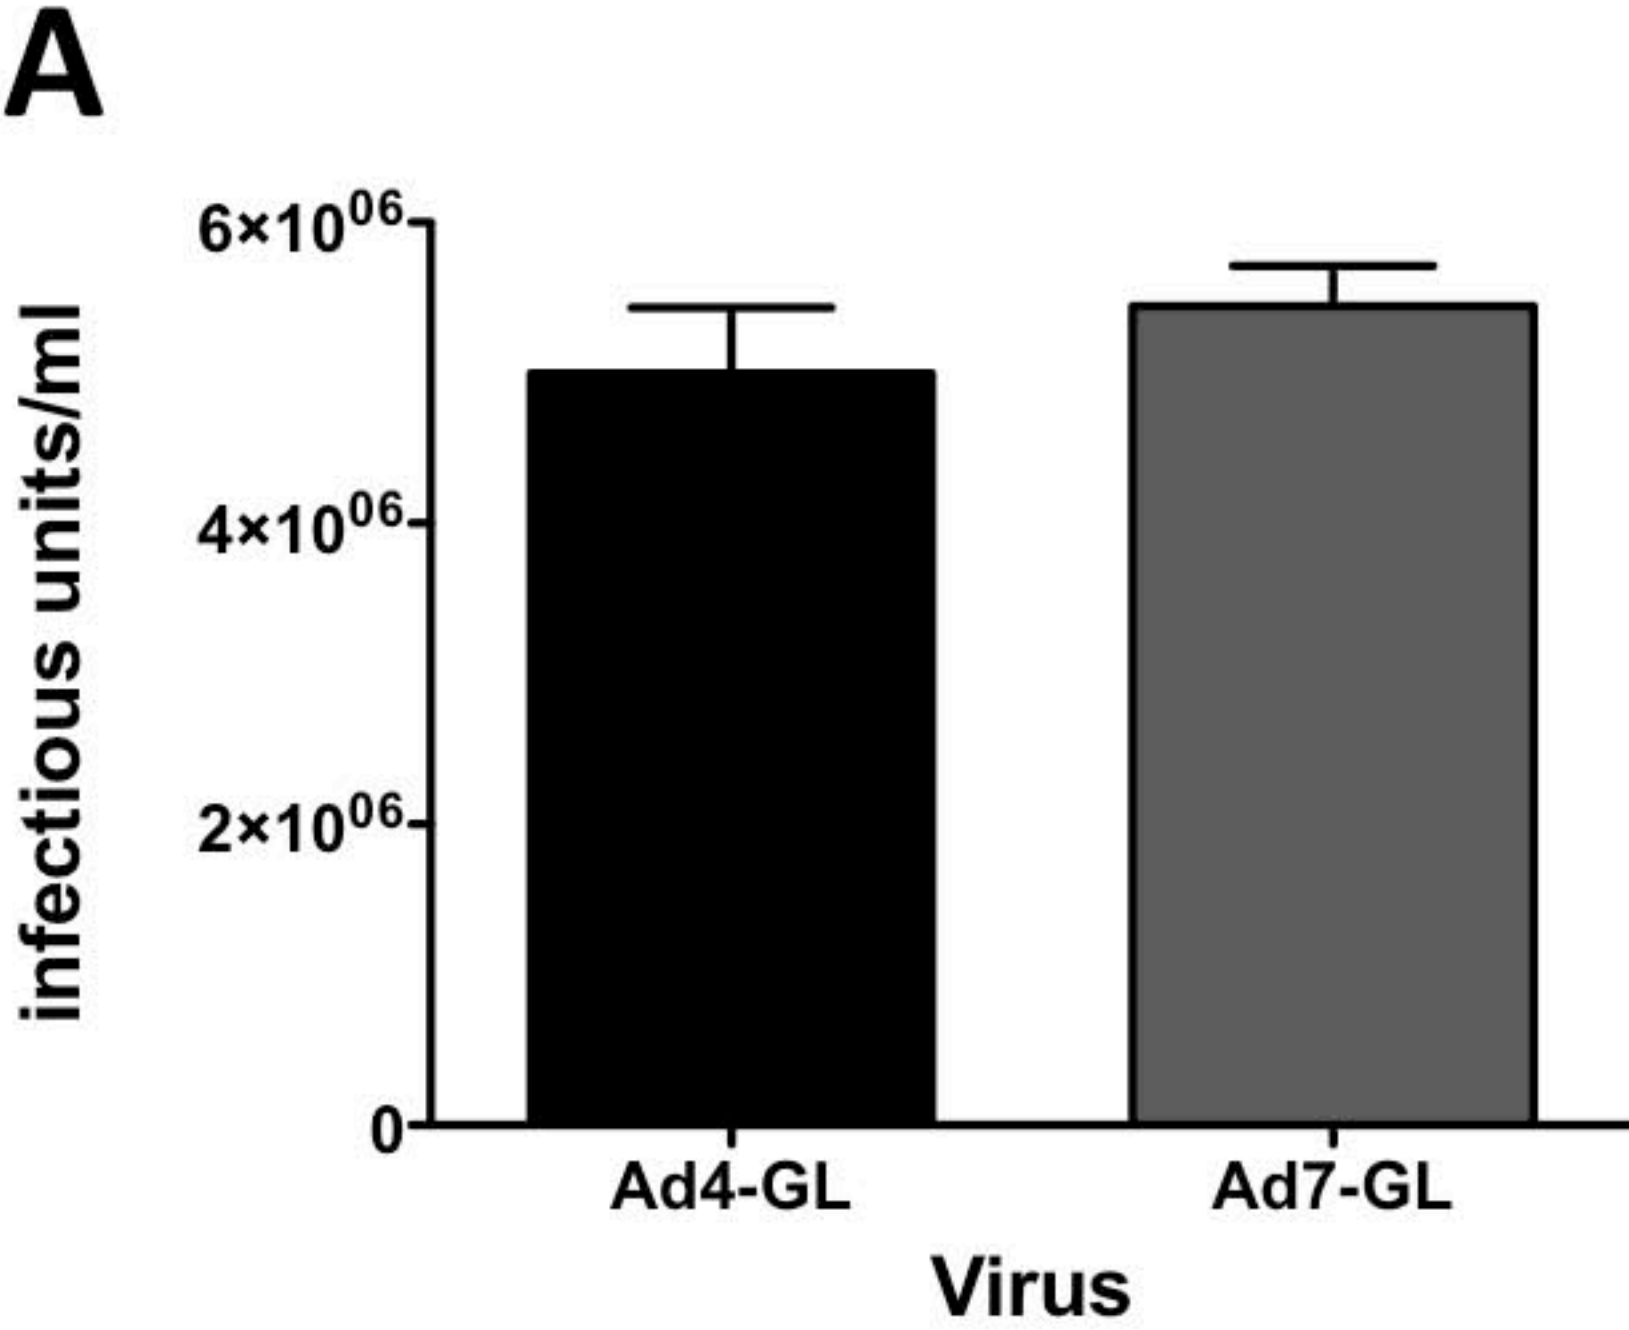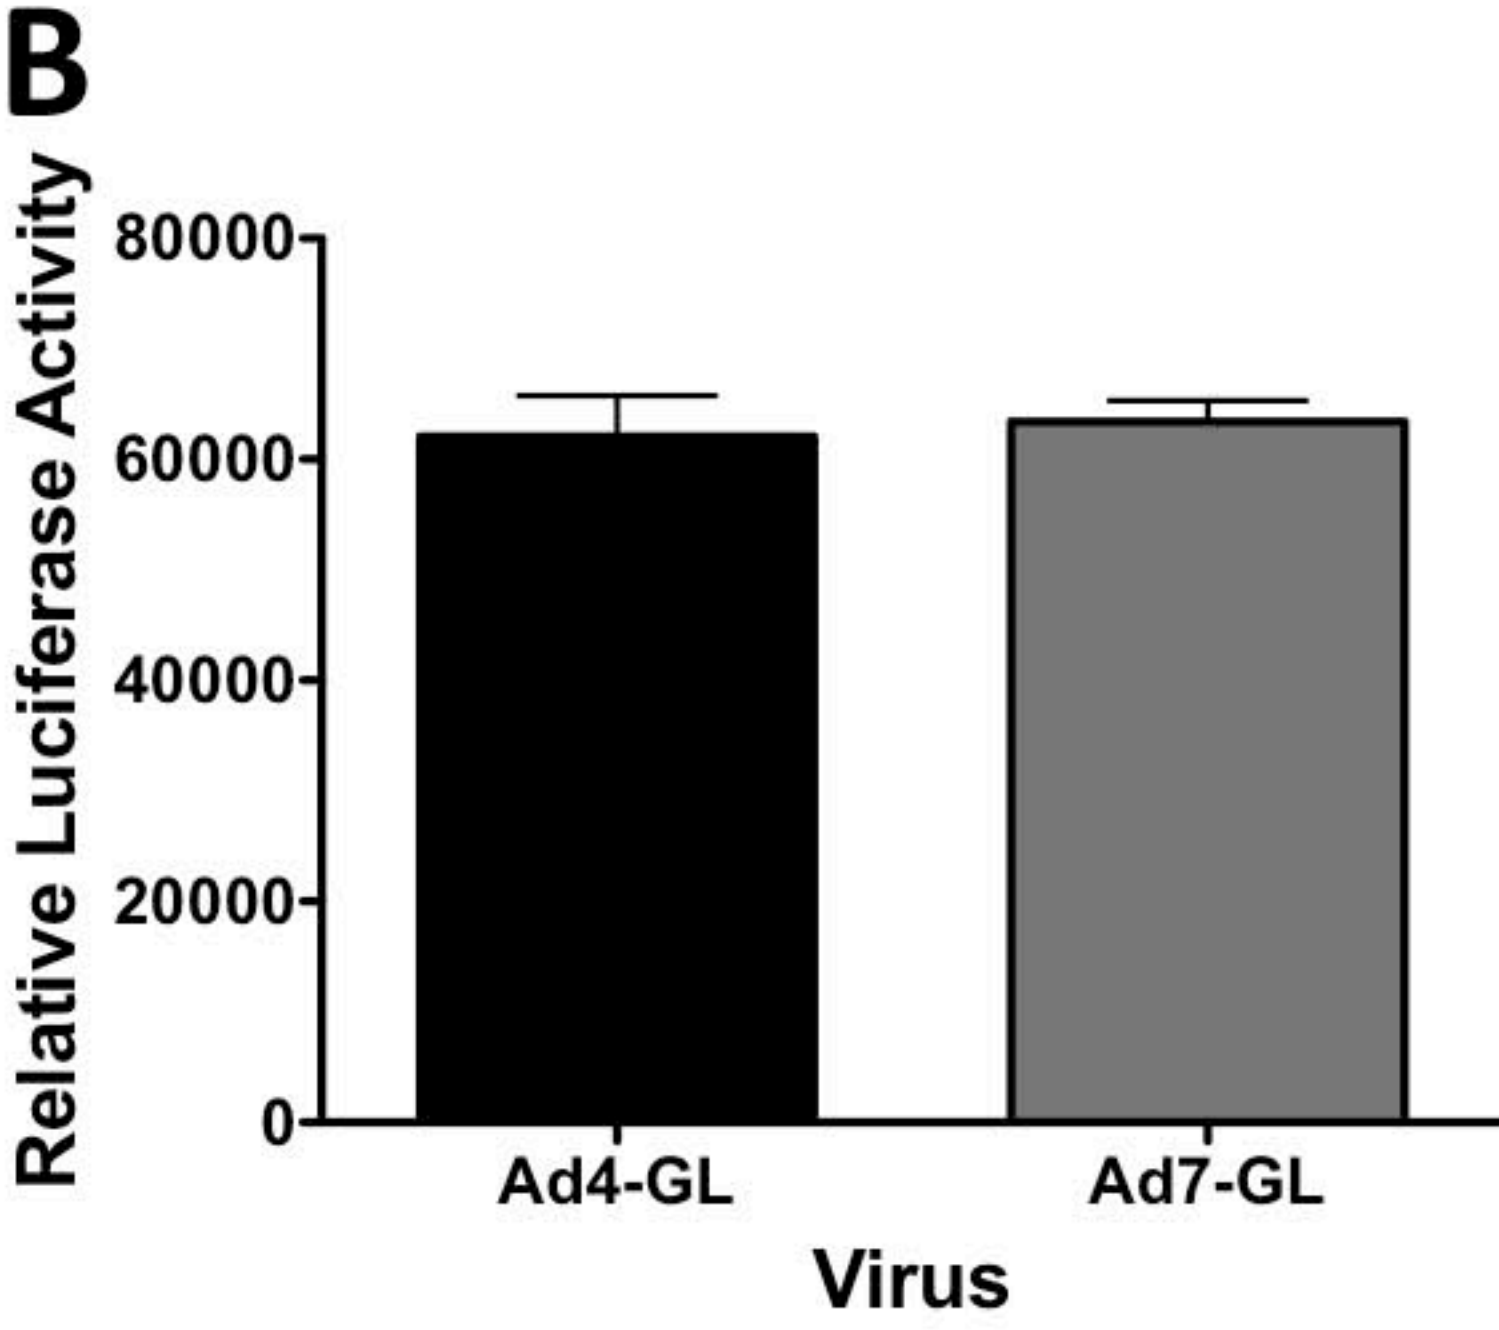

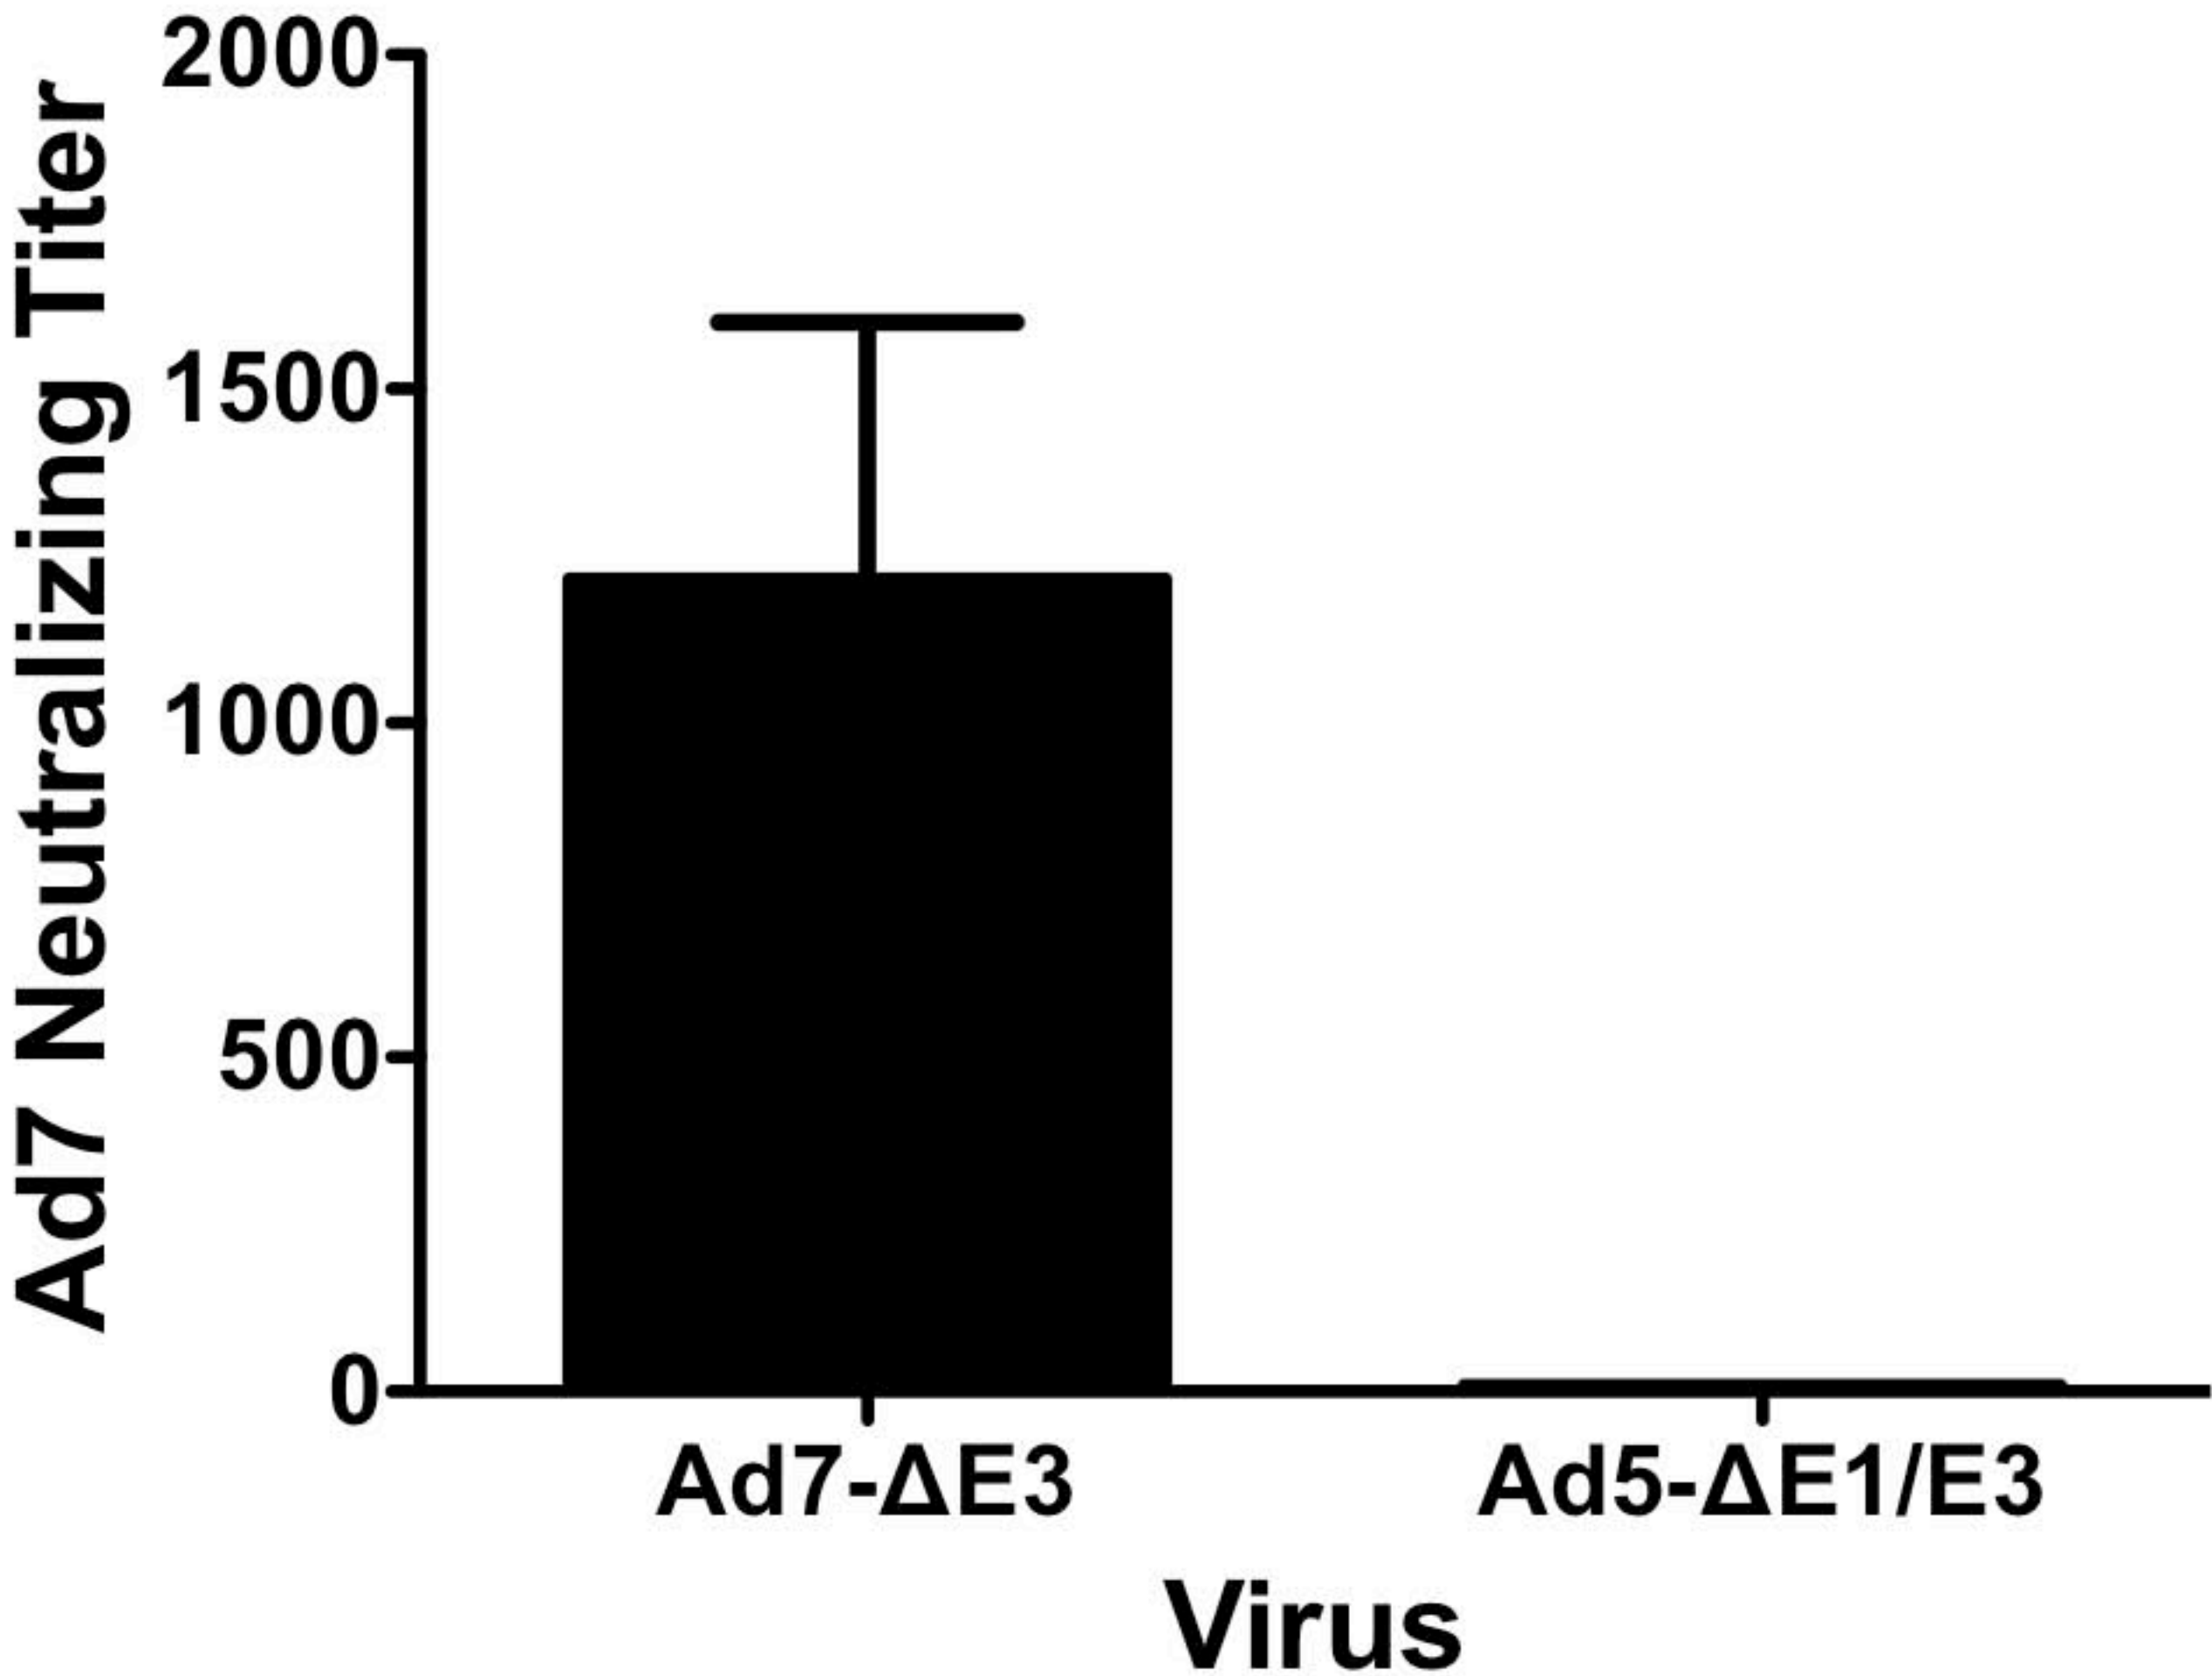

**Supplemental Figure 1. *In vitro* luciferase activity and infectious units of Ad4 and Ad7 viruses.** In order to determine if both Ad vaccines were capable of expressing equivalent levels of transgene protein we measure luciferase activity in Ad4 and Ad7 virus infected 293 cells (A). In order to determine the virus particle to infectious unit ratios, the Ad4 and Ad7 virus transduction of 293 cells *in vitro* was determined. 293 cells were incubated with the viruses expressing GFP<sub>Luc</sub> and quantitated by direct visualization using fluorescent microscopy (B). Error bars indicate standard deviation.

**Supplemental Figure 2. Ad7 *in vivo* induced neutralization.** BALB/s mice were immunized with 10<sup>10</sup> vp/mouse of Ad7 expressing GFP<sub>Luc</sub>. Sera was collected on day 21 post-immunization and Ad7 neutralizing antibodies were measured. The mean titer that inhibited 90% of Ad7 luciferase expression is shown. Error bars indicate standard deviation (n = 5).
